# Supplementary material for: In situ single cell detection via microfluidic magnetic bead assay
Source: PubMed Central journal article supplement (PMC5319813; doi:10.1371/journal.pone.0172697), 2017-02-21
Supplement: pone.0172697.s001.pdf [file pone.0172697.s001.pdf]

Supporting Information

## ***In situ* single cell detection via microfluidic magnetic bead assay**

Fan Liu,<sup>†</sup> Pawan KC,<sup>§</sup> Ge Zhang,<sup>§</sup> \*and Jiang Zhe<sup>†</sup> \*

<sup>†</sup> Department of Mechanical Engineering, University of Akron, Akron, Ohio 44325, United States

<sup>§</sup> Department of Biomedical Engineering, University of Akron, Akron, Ohio 44325, United States

\* Correspondence should be addressed to [jzhe@uakron.edu](mailto:jzhe@uakron.edu), [ge10@uakron.edu](mailto:ge10@uakron.edu)

This document contains the equivalent circuit for the single cell detection device.

**The equivalent circuit for the single cell detection device.**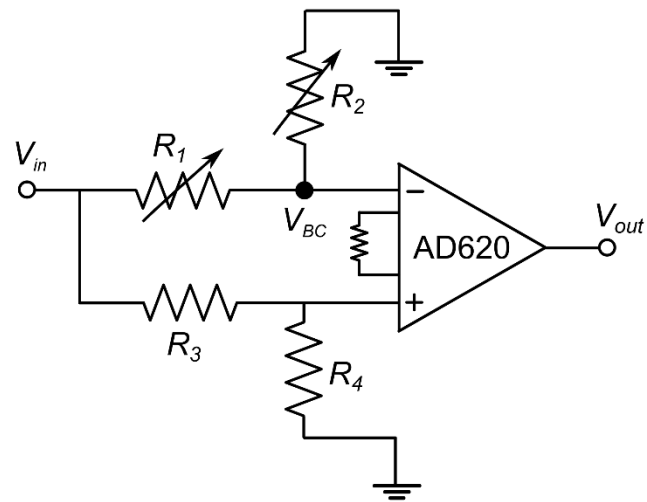

Fig S-1. The Equivalent circuit for the single cell detection device.  $R_1$  and  $R_2$  represent the resistance of the two successive Coulter counters.  $R_3=R_4=500\text{k}\Omega$ . The voltage output  $V_{BC}$  was amplified by the differential amplifier (AD620, Analog Device, USA) and output as  $V_{out}$ .
